# Supplementary material for: A facile fabrication of 1D/2D nanohybrids composed of NiCo-hydroxide nanowires and reduced graphene oxide for high-performance asymmetric supercapacitors
Source: Royal Society of Chemistry journal article supplement (doi:10.1039/c9qi00681h), 2019-10-21
Supplement: c9qi00681h1.pdf [file c9qi00681h1.pdf]

## Facile fabrication of 1D/2D nanohybrids composed of NiCo-hydroxide nanowires and reduced graphene oxide for high-performance asymmetric supercapacitors

*Xu Zhang<sup>a\*</sup>, Qiuyu Fan<sup>a</sup>, Siyu Liu<sup>b</sup>, Ning Qu<sup>a</sup>, He Yang<sup>a</sup>, Man Wang<sup>b</sup>, and Juan Yang<sup>b\*</sup>*

<sup>a</sup>State Key Laboratory of Fine Chemicals, School of Chemical Engineering, Dalian University of Technology, Panjin 124221, China

<sup>b</sup>School of Chemical Engineering and Technology, Xi'an Jiaotong University, Xi'an 710049, China.

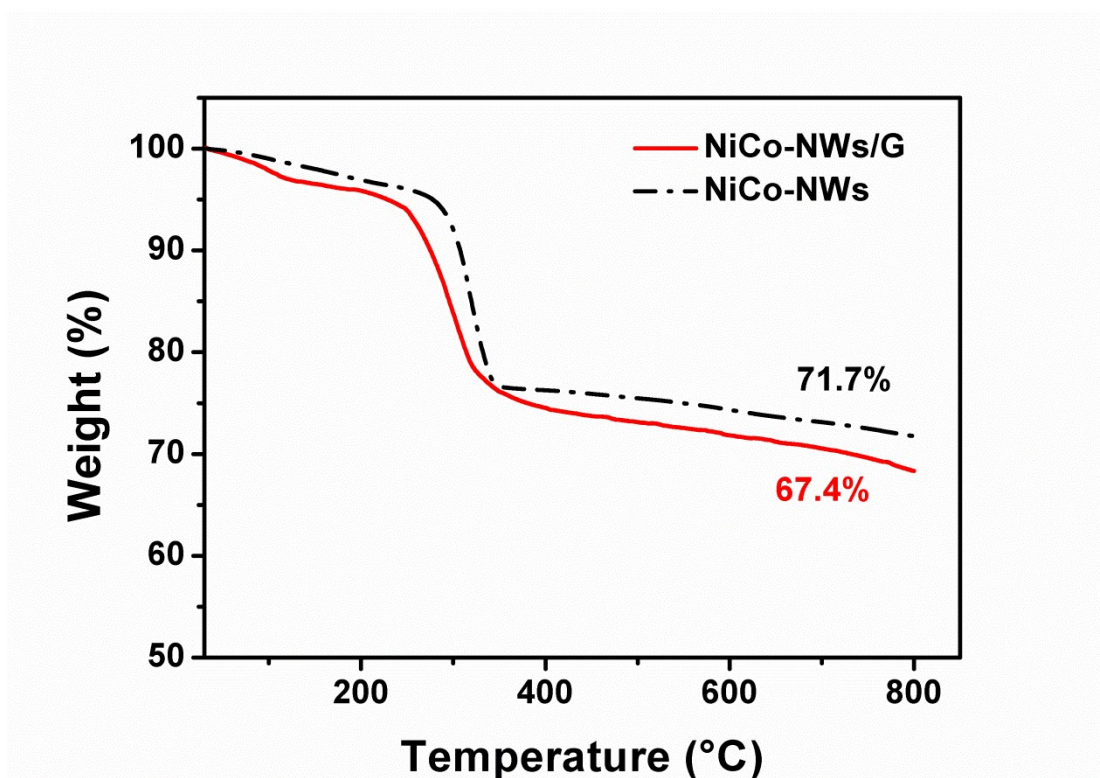

Fig. S1. TGA curves of the NiCo-NWs and NiCo-NWs/G

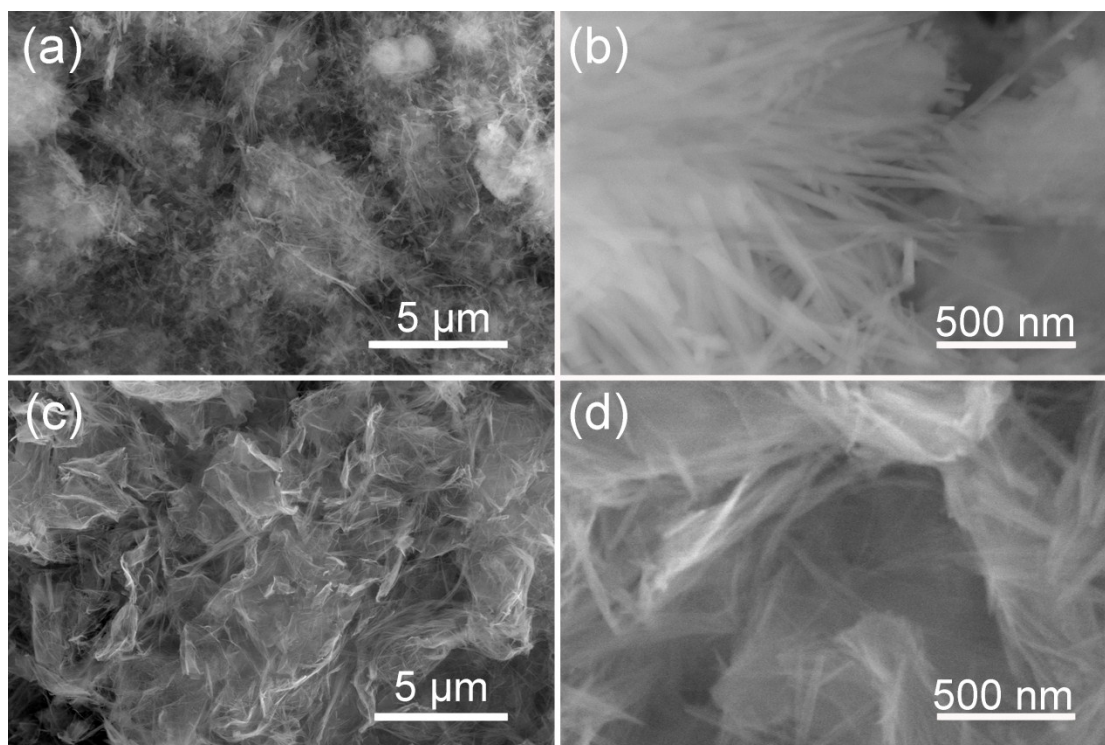

Fig. S2. SEM images of (a, b) NiCo-NWs; (c, d) NiCo-NWs/G

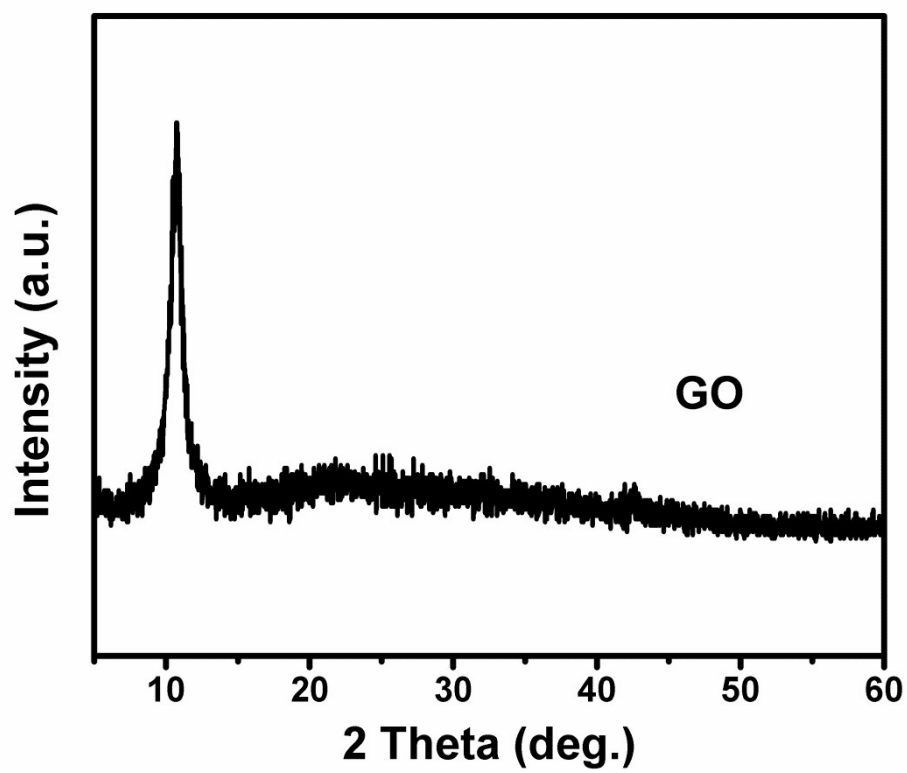

Fig. S3. XRD patterns of GO

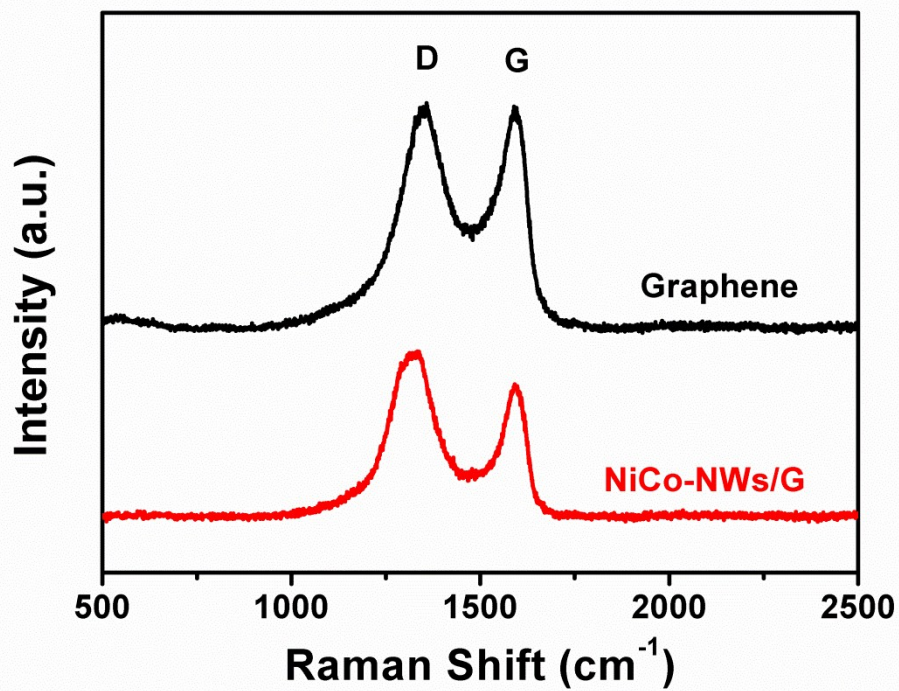

Fig. S4. Raman spectra of the graphene and NiCo-NWs/G

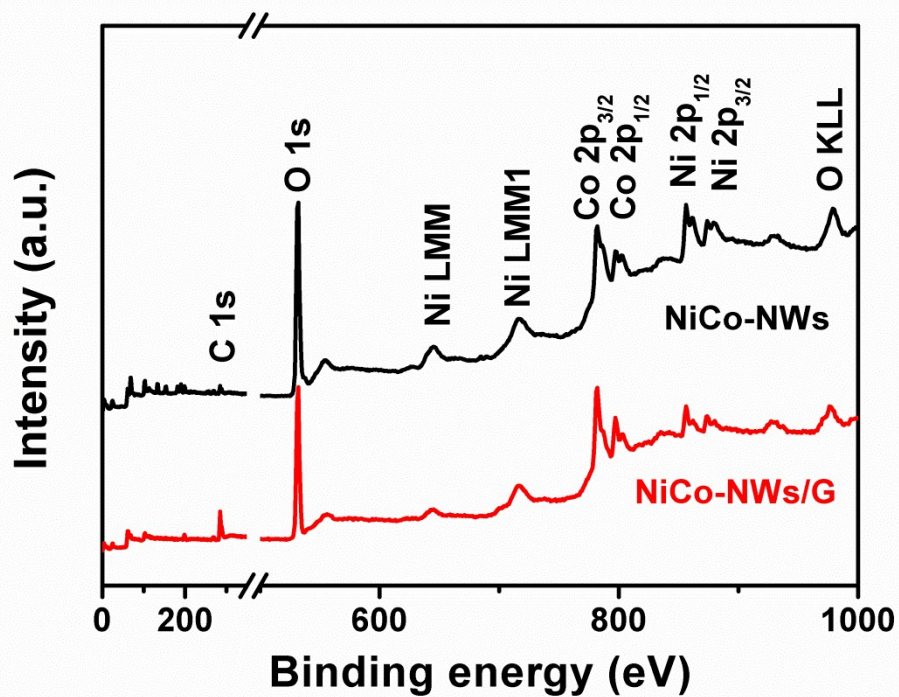

Fig. S5. XPS survey spectra of NiCo-NWs and NiCo-NWs/G

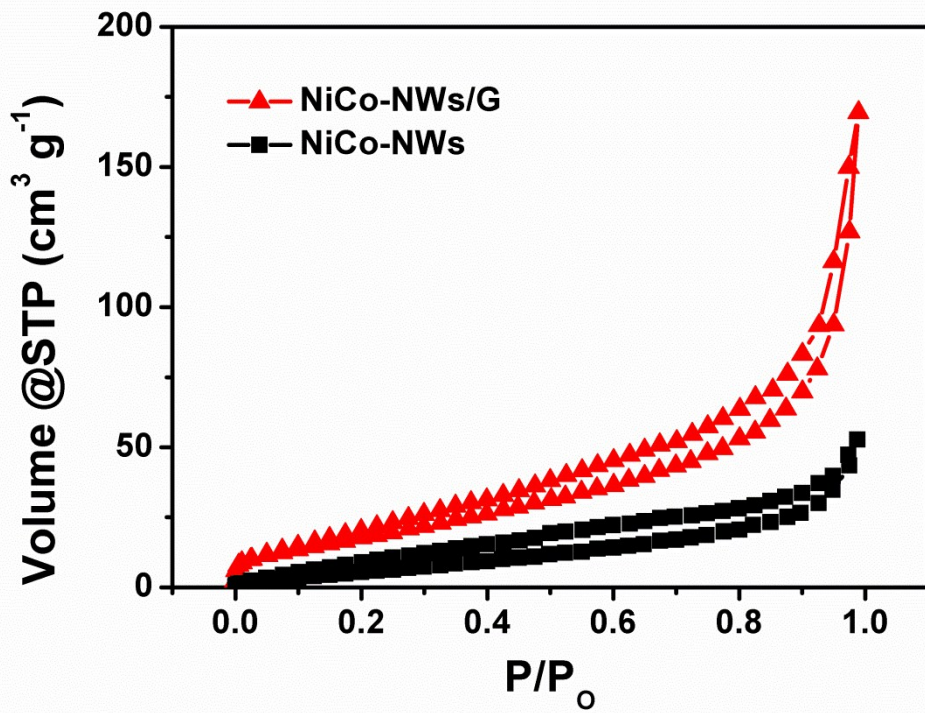

Fig. S6. Nitrogen adsorption-desorption isotherms of NiCo-NWs and NiCo-NWs/G

Table S1 Capacitances of the representative NiCo-hydroxide/graphene composites in aqueous electrolytes

| NO. | Sample                                  | Current density (A g <sup>-1</sup> ) | Specific capacitance (F g <sup>-1</sup> ) | References |
|-----|-----------------------------------------|--------------------------------------|-------------------------------------------|------------|
| 1.  | NiCo-NWs/G                              | 1                                    | 1449                                      | This work  |
| 2   | G-CH                                    | 1                                    | 1398                                      | 1          |
| 3   | NiCo-LDH-G                              | 1                                    | 1489                                      | 2          |
| 4   | rGO@NiCo                                | 0.5                                  | 518                                       | 3          |
| 5   | NiCo LDH@NG                             | 2                                    | 1421                                      | 4          |
| 6   | NF@RGO/Ni-Co LDH                        | 1                                    | 1454                                      | 5          |
| 7   | NiCo-LDH/RGO-1                          | 2                                    | 1501                                      | 6          |
| 8   | H-3DRG@NiCo-LDH                         | 0.5                                  | 227 mA h g <sup>-1</sup>                  | 7          |
| 9   | Ni <sub>2</sub> Co <sub>2</sub> -OH/rGO | 0.5                                  | 1691                                      | 8          |

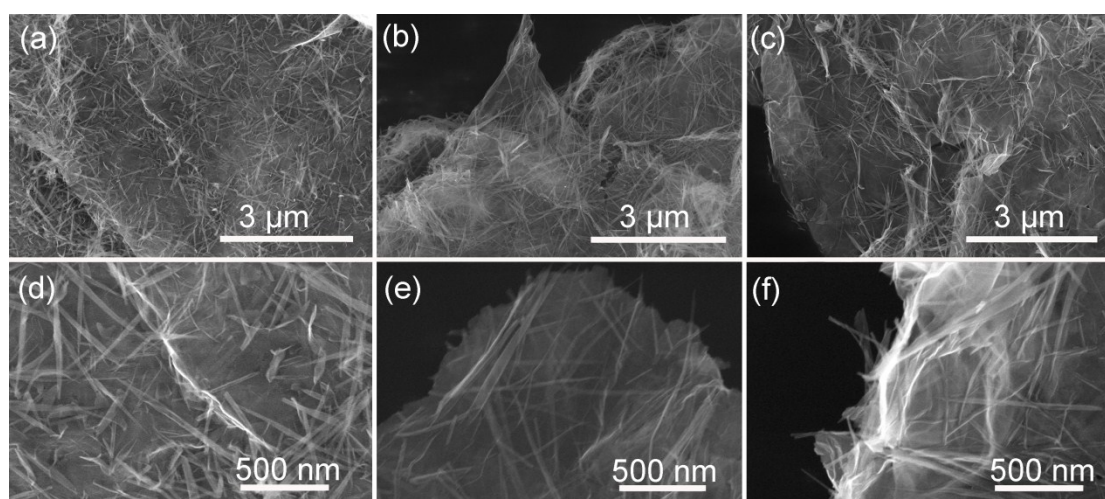

**Fig. S7.** SEM images of (a, d) NiCo-NWs/G-4; (b, e) NiCo-NWs/G-8; (c, f) NiCo-NWs/G-24

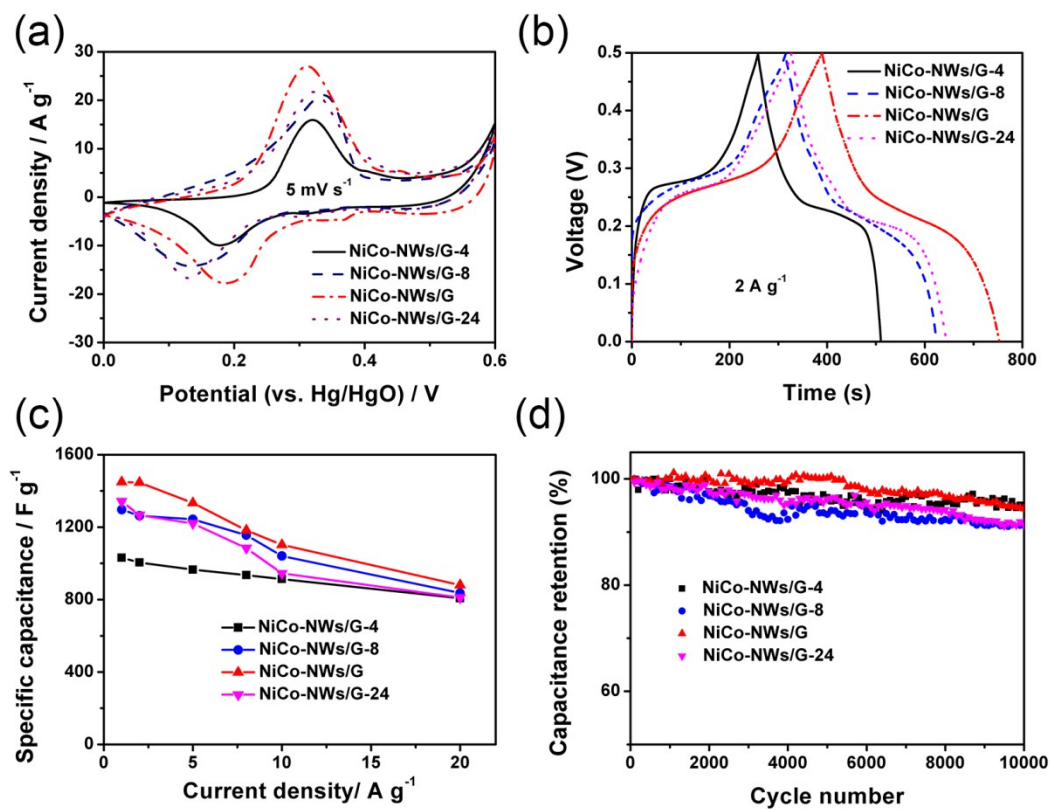

**Fig S8.** Electrochemical performance of NiCo-NWs/Gs for supercapacitors: a) CV curves at scan rates of 5 mV s<sup>-1</sup>; b) galvanostatic charge-discharge curves at a current density of 2 A g<sup>-1</sup>; c) specific capacitances at different current densities; and d) cycling performance of different samples at a current density of 10 A g<sup>-1</sup>.

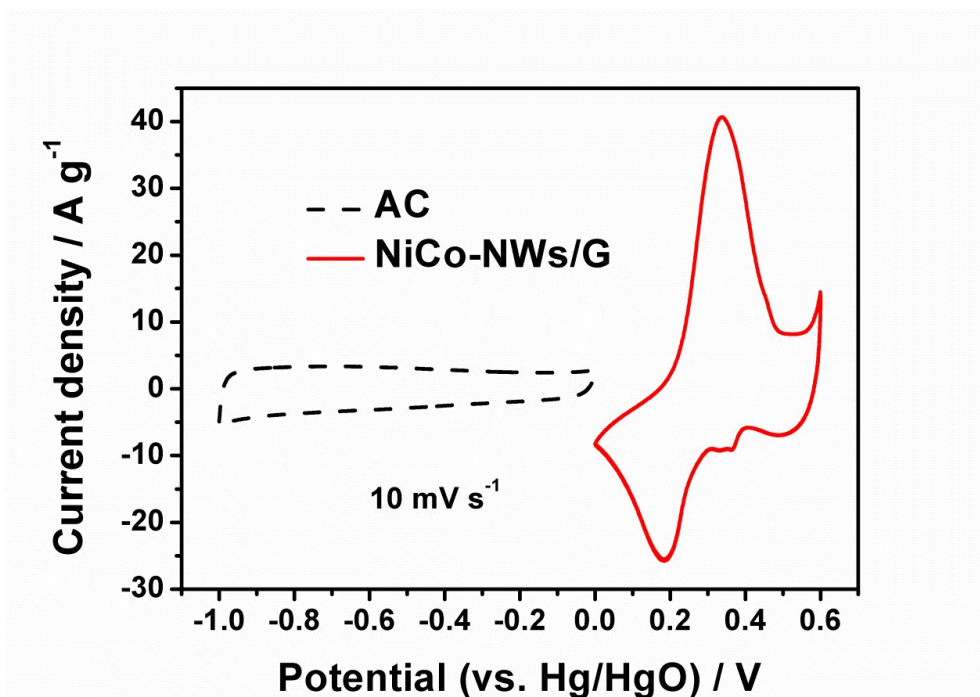

Fig. S9. CV curves of NiCo-NWs/G and active carbon electrodes tested at a scan rate of  $10 \text{ mV s}^{-1}$

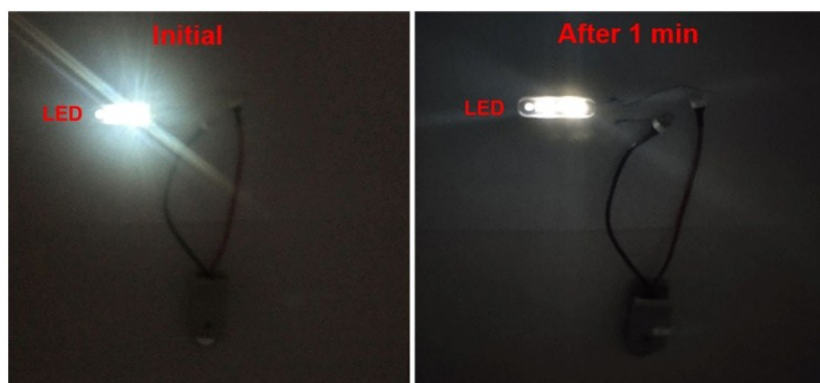

Fig. S10. Images showing that as-assembled asymmetric supercapacitors powered by the 10 s charged can lighten up six LED indicators.

### References

1. J. Yang, C. Yu, X. Fan, C. Zhao and J. Qiu, *Adv. Funct. Mater.*, 2015, **25**, 2109-2116.
2. J. Yang, C. Hu, M. Wang, S. Li, Hu. Huang, Karen Bustillo, Han, Wei Guo, Z. Zeng, H. Zheng and J. Qiu, *Adv. Funct. Mater.*, 2018, **28**, 1803272.
3. H. D. Lim, B. K. Kang, S. N. Tiruneh and D. H. Yoon, *Sci. Adv. Mater.*, 2017, **9**, 1241-1247.
4. B. Mehrabimatin, E. P. Gilshteyn, M. E. M. Buan, O. Sorsa, H. Jiang, A. I. Zad, S. Shahrokhian, A. G. Nasibulin and T. Kallio, *Energy Technol.*, 2019, **7**, 1801002.

5. L. Jiang, Y. Sui, J. Qi, Y. Chang, Y. He, Q. Meng, F. Wei, Z. Sun and Y. Jin, *Appl. Surf. Sci.*, 2017, **426**, 148-159.
6. X. Cai, X. Shen, L. Ma, Z. Ji, C. Xu and A. Yuan, *Chem. Eng. J.*, 2015, **268**, 251-259.
7. K. Qin, L. Wang, S. Wen, L. Diao, P. Liu, J. Li, L. Ma, C. Shi, C. Zhong, W. Hu, E. Liu and N. Zhao, *J. Mater. Chem. A*, 2018, **6**, 8109-8119.
8. H. Ma, J. He, D. Xiong, J. Wu, Q. Li, V. Dravid and Y. Zhao, *ACS Appl. Mater. Inter.*, 2016, **8**, 1992-2000.
